1 **Roles for Mitochondrial Complex I subunits in regulating synaptic**  
2 **transmission and growth**

3

4 **Bhagaban Mallik<sup>1</sup>, C. Andrew Frank<sup>1,2\*</sup>**

5 <sup>1</sup>Department of Anatomy and Cell Biology, University of Iowa, USA, 52242

6 <sup>2</sup>Iowa Neuroscience Institute, University of Iowa Carver College of Medicine, Iowa City, IA,  
7 USA

8 \*to whom correspondence should be addressed

9 [andy-frank@uiowa.edu](mailto:andy-frank@uiowa.edu)

10

11 **Keywords:** *Drosophila melanogaster*; synaptic homeostasis; neurotransmission; plasticity;  
12 mitochondria; Mitochondrial Complex I; *ND-20L*; HRP; NMJ; DLG

13

14

15 **Abstract**

16 To identify conserved components of synapse function that are also associated with human  
17 diseases, we conducted a genetic screen. We used the *Drosophila melanogaster* neuromuscular  
18 junction (NMJ) as a model. We employed RNA interference (RNAi) on selected targets and  
19 assayed synapse function by electrophysiology. We focused our screen on genetic factors known  
20 to be conserved from human neurological or muscle functions (321 total RNAi lines screened).  
21 Knockdown of a particular Mitochondrial Complex I (MCI) subunit gene (*ND-20L*) lowered  
22 levels of NMJ neurotransmission. Due to the severity of the phenotype, we studied MCI function  
23 further. Knockdown of core MCI subunits concurrently in neurons and muscle led to impaired  
24 neurotransmission. Further, pharmacology targeting MCI phenocopied the impaired  
25 neurotransmission phenotype. Finally, MCI subunit knockdowns led to profound cytological  
26 defects, including reduced NMJ growth and altered NMJ morphology. Mitochondria are  
27 essential for cellular bioenergetics and produce ATP through oxidative phosphorylation. Five  
28 multi-protein complexes achieve this task, and MCI is the largest. Impaired Mitochondrial  
29 Complex I subunits in humans are associated with disorders such as Parkinson's disease, Leigh  
30 syndrome, and cardiomyopathy. Together, our data present an analysis of Complex I in the  
31 context of synapse function and plasticity. We speculate that in the context of human MCI  
32 dysfunction, similar neuronal and synaptic defects could contribute to pathogenesis.

33

## 34 **1. Introduction**

35 Mitochondrial Complex I (MCI) is a multimeric enzyme with a molecular mass of about 1MDa  
36 (Hirst, 2013). It modulates the transfer of electrons from NADH to ubiquinone, facilitating ATP  
37 synthesis (Galkin et al., 2006; Galkin et al., 1999; Wikstrom, 1984). In humans, dysfunction of  
38 MCI activity can contribute to forms of neurodegeneration, and this is thought to be due to  
39 accumulation of excess reactive oxygen species (ROS) (Reviewed by (Breuer et al., 2013)). But  
40 on neuronal and synaptic levels, how exactly a buildup of ROS might manifest in disease  
41 phenotypes is unclear.

42 Structurally, Mitochondrial Complex I is comprised of 44 subunits in mammals; 42 of  
43 those are present in *Drosophila melanogaster* MCI, which is the focus of the present study  
44 (Garcia et al., 2017; Guerrero-Castillo et al., 2017). The 42 subunits of *Drosophila* MCI are  
45 comprised of 14 conserved subunits forming the catalytic core. The remaining 28 are termed  
46 accessory subunits (Garcia *et al.*, 2017) (Fig. 1A-B). Even though accessory subunits are not  
47 directly involved in catalysis, prior genetic and biochemical studies of MCI indicate that  
48 disruption of accessory subunits can produce high levels of reactive oxygen species (ROS),  
49 resulting in impaired MCI assembly and stability *in vivo* (Berger et al., 2008; Formosa et al.,  
50 2020; Guerrero-Castillo *et al.*, 2017; Stroud et al., 2016).

51 Mitochondrial Complex I subunits have been biochemically characterized from diverse  
52 species such as *Bos taurus* (Clason et al., 2010), *Yarrowia lipolytica* (Kashani-Poor et al., 2001;  
53 Radermacher et al., 2006), *Pichia pastoris* (Bridges et al., 2009), *Neurospora crassa* (Guenebaut  
54 et al., 1997; Leonard et al., 1987), *Drosophila melanogaster* (Garcia *et al.*, 2017), Humans  
55 (Murray et al., 2003) and rodents (Schilling et al., 2005). Electron microscopy approaches  
56 revealed that MCI has an L-shaped architecture, including arms that extend into the membrane  
57 and the periphery (Clason *et al.*, 2010; Guenebaut et al., 1998; Leonard *et al.*, 1987;  
58 Radermacher *et al.*, 2006). Subsequent X-ray crystallography analyses were performed in the  
59 entire mitochondrial complex from the *Y. lipolytica* at 6.3 Å resolution (Hunte et al., 2010).

60 Pharmacology in animal models has helped to elucidate some information about MCI  
61 activity and physiological consequences of its dysfunction. Two pharmacological agents that  
62 target MCI are rotenone and paraquat, which block the flow of electrons from NADH to

63 ubiquinone and trigger ROS formation in cells (Cocheme and Murphy, 2008; Degli Esposti,  
64 1998; Fato et al., 2009). Studies in the fruit fly *Drosophila melanogaster* have assessed the  
65 effects of rotenone and paraquat on MCI *in vivo* physiology. In flies, paraquat impairs neuronal  
66 and mitochondrial function (Hosamani and Muralidhara, 2013). Similarly, delivering rotenone to  
67 flies triggers superoxide formation, leading to defects in locomotor ability (Leite et al., 2018).  
68 Antidotal pharmacology can abate these phenotypes. For example, eicosapentaenoic (EPA) and  
69 docosahexaenoic (DHA) omega-3 fatty acids reversed neurotoxic effects in flies induced by  
70 paraquat (de Oliveira Souza et al., 2019). Additionally, the sesquiterpene alcohol (-)- $\alpha$ -bisabolol  
71 (BISA) successfully reversed rotenone-induced locomotion and lethality phenotypes in flies  
72 (Leite et al., 2018).

73 Genetic studies of MCI dysfunction in animals have shed light on possible physiological  
74 consequences of mutation of specific subunits (Mayr et al., 2015). One of these subunits, human  
75 NDUFS4, is required for MCI assembly, and misregulation of NDUFS4 has been linked with  
76 Leigh syndrome and cardiomyopathy (Fassone and Rahman, 2012). Modeling this deficiency in  
77 fruit flies, NDUFS4 depletion (*Drosophila* ND-18) leads to a state of progressive  
78 neurodegeneration, locomotor defects, and a shortened life span (Foriel et al., 2018).  
79 Additionally, among the mitochondrially-encoded MCI subunits, *Drosophila* ND2 loss-of-  
80 function mutants display behaviors reminiscent of human mitochondrial disease, including  
81 reduced life span and neurodegeneration (Burman et al., 2014). Recently, a genetic study  
82 disrupting mouse MCI specifically in dopaminergic neurons showed that loss of MCI alone was  
83 sufficient to induce progressive phenotypes reminiscent of Parkinson's Disease (Gonzalez-  
84 Rodriguez et al., 2021).

85 Despite the existence of animal genetic models – and despite the association of MCI  
86 dysfunction with human neurophysiological and neuromuscular disorders – extensive systematic  
87 functional analyses have not been performed to understand MCI roles on a subcellular level in  
88 neurons or synapses. Here, we report a small-scale electrophysiology-based RNA interference-  
89 based screen covering human neurological and muscle-related genes in *Drosophila* (321 lines).  
90 Our screen identified an MCI subunit line whose knockdown in the muscle and neuron led to  
91 aberrant neurotransmission. Follow-up electrophysiology showed that genetic depletion of other  
92 MCI subunit genes and pharmacology phenocopied this neurotransmission phenotype. On a

93 synapse level, we found that depletion of MCI subunits affected NMJ structural plasticity.  
94 Together, our data support a core role for MCI subunits in synaptic transmission and plasticity.  
95 Combined with prior studies, we argue that genetic modeling in fruit flies could be a useful way  
96 to understand the mechanisms of MCI subunits in synapse regulation. In turn, this establishes  
97 *Drosophila melanogaster* as a potential organism to further model MCI deficiency diseases.

98

## 99 **2. Materials and methods**

### 100 ***Drosophila* husbandry**

101 *Drosophila melanogaster* was cultured on a traditional cornmeal media containing molasses  
102 according to a recipe from the Bloomington *Drosophila* Stock Center (BDSC, Bloomington, IN).  
103 *Drosophila* husbandry was performed according to standard practices (James et al., 2019). For  
104 experiments, larvae were raised at 25°C or 29°C in humidity-controlled and light-controlled  
105 Percival DR-36VL incubators (Geneva Scientific).

### 106 ***Drosophila* stocks**

107 *w<sup>1118</sup>* (Hazelrigg et al., 1984) was used as a non-transgenic wild-type stock. The *UAS-*  
108 *GluRIII[RNAi]* line was utilized to screen homeostatic candidate molecules as described  
109 previously (Brusich et al., 2015). The Gal4 drivers used simultaneously for the Pre+Post-Gal4  
110 conditions were *elav<sup>C155</sup>-Gal4*, *Sca-Gal4*, and *BG57-Gal4*. Many *UAS-RNAi* or genetic mutant  
111 lines were obtained from the Bloomington *Drosophila* Stock Center (Supplementary Table S3).

### 112 **Immunohistochemistry**

113 Wandering third instar larvae were dissected and fixed on a sylgard Petri plate in ice-cold  $\text{Ca}^{2+}$   
114 HL-3 and fixed in 4% paraformaldehyde in PBS for 30 minutes or in Bouin's fixative for 2  
115 minutes as described earlier (Raut et al., 2017). The larvae were washed with PBS containing  
116 0.2% Triton X-100 (PBST) for 30 min, blocked for an hour with 5% normal goat serum in  
117 PBST, and incubated overnight in primary antibodies at 4°C followed by washes and incubation  
118 in secondary antibodies. Monoclonal antibodies such as anti-Dlg (4F3), anti-Synapsin (3C11)  
119 were obtained from the Developmental Studies Hybridoma Bank (University of Iowa, USA). All  
120 were used at 1:30 dilution. Fluorophore-coupled secondary antibodies Alexa Fluor 488, Alexa

121 Fluor 568 or Alexa Fluor 647 (Molecular Probes, Thermo Fisher Scientific) were used at 1:400  
122 dilution. Alexa 488 or 647 and Rhodamine-conjugated anti-HRP were used at 1:800 and 1:600  
123 dilutions, respectively (Jackson ImmunoResearch Laboratories, Inc.). The larval preparations  
124 were mounted in VECTASHIELD (Vector Laboratories, USA) and imaged with a laser scanning  
125 confocal microscope (LSM 710; Carl Zeiss). All the images were processed with Adobe  
126 Photoshop 7.0 (Adobe Systems, San Jose, CA).

127

### 128 **Confocal imaging, quantification, and morphometric analysis**

129 Samples were imaged using a 700 Carl Zeiss scanning confocal microscope equipped with  
130 63×/1.4 NA oil immersion objective using separate channels with four laser lines (405, 488, 561,  
131 and 637 nm) at room temperature. The boutons were counted using anti-Synapsin co-stained  
132 with anti-Dlg on muscle 6/7 of A2 hemisegment, considering each Synapsin punctum to be a  
133 bouton. At least 8 NMJs were used for bouton number quantification. All genotypes were  
134 immunostained in the same tube with identical reagents for fluorescence quantifications of then  
135 mounted and imaged in the same session. Z-stacks were obtained using similar settings for all  
136 genotypes with z-axis spacing between 0.5-0.7  $\mu\text{m}$  and optimized for detection without  
137 saturation of the signal. The Image J software (National Institutes of Health) analysis toolkit used  
138 maximum intensity projections for quantitative image analysis. Boutons from muscle 6/7 of A2  
139 hemisegment from at least six NMJ synapses were used to quantify Image J software.

140

### 141 **Statistical Analyses**

142 Student's t-test for pairwise and One-way ANOVA with a Tukey's post-hoc test for multiple  
143 comparisons was used for statistical analysis (GraphPad Prism Software). Statistical tests are  
144 noted in the figure legends and supplementary table files and shown in graphs. The data are  
145 presented as mean $\pm$ s.e.m. \*  $p < 0.05$ , \*\*  $p < 0.01$ , \*\*\*  $p < 0.001$ .

146

### 147 **Electrophysiology and pharmacology**

148 All dissections and recordings were performed in a modified HL3 saline (Stewart et al., 1994)  
149 containing 70 mM NaCl, 5 mM KCl, 10 mM MgCl<sub>2</sub>, 10 mM NaHCO<sub>3</sub>, 115 mM sucrose, 4.2  
150 mM trehalose, 5 mM HEPES, and 0.5 mM CaCl<sub>2</sub> (unless otherwise noted), pH 7.2.  
151 Neuromuscular junction sharp electrode (electrode resistance between 20-30 MΩ) recordings  
152 were performed on muscles 6/7 of abdominal segments A2 and A3 in wandering third-instar  
153 larvae as described (James *et al.*, 2019). Larval NMJs recordings were performed on a Leica  
154 microscope in an HL3 buffer containing 10 mM Mg<sup>2+</sup> and 0.5 mM Ca<sup>2+</sup> concentrations using a  
155 10x objective and acquired using an Axoclamp 900A amplifier, Digidata 1440A acquisition  
156 system, and pClamp 10.7 software (Molecular Devices). Electrophysiological sweeps were  
157 digitized at 10 kHz and filtered at 1 kHz. Data were analyzed using Clampfit (Molecular devices)  
158 and MiniAnalysis (Synaptosoft) software. Miniature excitatory post-synaptic potentials  
159 (mEPSPs) were recorded without any stimulation and motor axons were stimulated to elicit  
160 excitatory post-synaptic potentials (EPSPs). Average mEPSP, EPSP were determined for each  
161 muscle and quantal content was calculated by dividing average EPSP amplitude by average  
162 mEPSP amplitude. Muscle input resistance ( $R_{in}$ ) and resting membrane potential ( $V_{rest}$ ) were  
163 monitored during each experiment. Recordings were rejected if the  $V_{rest}$  was above -60 mV and  
164  $R_{in}$  was less than 5 MΩ.

165

### 166 **3. Results**

#### 167 **An electrophysiology-based screen identifies Mitochondrial Complex I subunits in** 168 ***Drosophila***

169 RNA interference (RNAi) is a powerful genetic approach. In *Drosophila*, RNAi screens have  
170 identified novel genes involved in diverse processes, such as nervous system development, eye  
171 development, and wound closure (Koizumi et al., 2007; Lesch et al., 2010; Pignoni et al., 1997;  
172 Raut *et al.*, 2017; Yamamoto et al., 2014). Prior reports indicate that many human diseases that  
173 affect muscle and nervous system health could have primary defects in synaptic function or  
174 plasticity (Hirth, 2010). However, the specific functional requirements remain unclear.

175 Our goal for this study was to survey homologs of selected human disease genes to test if  
176 they may also have conserved roles in synapse function or plasticity. We performed a targeted

177 RNAi-mediated reverse genetic screen in *Drosophila*. We picked 321 publicly available *UAS*-  
178 driven RNAi lines linked to human neurological and muscle-related disorders, and we knocked  
179 down the chosen target genes pan-neuronally and in muscles (Fig. 1A). Because RNAi-mediated  
180 knockdown can cause off-target effects or only partial depletion of gene function (Dietzl et al.,  
181 2007), we used multiple RNAi lines for genes, whenever possible.

182 Our main data collection assay was *Drosophila* neuromuscular junction (NMJ)  
183 electrophysiology. We recorded spontaneous miniature excitatory postsynaptic potentials  
184 (mEPSPs) and excitatory postsynaptic potentials (EPSPs). From these data we were able to  
185 assess for each gene knockdown: 1) baseline neurophysiology levels for quantal size, evoked  
186 potentials, and quantal content (see Methods); and 2) the maintenance of a form of synaptic  
187 plasticity, called presynaptic homeostatic potentiation (PHP). We assessed PHP via pre- and  
188 post-synaptic knockdown of an RNAi line plus knockdown of a glutamate receptor subunit gene  
189 (*GluRIII* RNAi), as we have shown previously, as a means of homeostatically challenging  
190 synapse function through decreased quantal size (Brusich *et al.*, 2015; James *et al.*, 2019).

191 Baseline control electrophysiology of the Gal4 driver lines alone yielded mEPSPs of  $0.75$   
192  $\pm 0.03$  mV, EPSPs of  $37.67 \pm 2.19$  mV, and quantal content of  $49.70 \pm 1.71$  (Fig. 2B, Table S1).  
193 Screened Gal4 + RNAi lines with average EPSP amplitudes  $\leq 24$  mV were classified as putative  
194 hits for this screen (Figure: 2B). These shortlisted RNAi lines were further tested for possible  
195 defects in PHP with concurrent knockdown of *GluRIII* RNAi.

196 The cumulative data revealed an intriguing phenotype for a line targeting *ND-20L*, an  
197 essential component of Mitochondrial Complex I (electron transport chain of mitochondria).  
198 Compared to the driver control alone, pre- + postsynaptic Gal4 drivers + *UAS-ND-20L[RNAi]*  
199 caused a significant defect in baseline evoked neurotransmission (Fig. 2B-D), no defect in  
200 quantal size (Fig. 2C-D), and a significant defect in calculated quantal content (QC, Fig. 2D).  
201 When presented the homeostatic challenge *UAS-GluRIII[RNAi]* genetic background, *ND-20L*  
202 knockdown by RNAi did decrease evoked neurotransmission (EPSP amplitude) significantly  
203 further than the non-challenged *ND-20L[RNAi]* control (Fig. 2C-D, Table S1). Yet there was  
204 nevertheless a slight homeostatic increase in QC (Fig. 2D). Together, our screen data suggest  
205 that Complex I subunits in *Drosophila* could regulate baseline synapse function by regulating the  
206 activity of the electron transport system. We tested this idea further.



207

## 208 **Mitochondrial Complex I subunits in neurons and muscle regulate synapse function**

209 ND-20L/NDUFS7 is a core MCI subunit. To assess whether synaptic transmission is altered after  
210 perturbation of other core MCI subunits, we recorded baseline NMJ neurotransmission after  
211 knocking down the subunits concurrently in neurons and muscle.

212 We acquired RNAi-based tools for all core subunits. In each case, the amplitudes of  
213 spontaneous miniature postsynaptic potentials (mEPSP) were not significantly altered in pre- +  
214 postsynaptic-depleted Complex I subunits (Fig 3A-S, Table S1). Nor did we find any notable  
215 change in mini frequency in pre- + postsynaptic knockdown of Complex I subunits (Table S1).  
216 However, for every case the amplitude of evoked postsynaptic potentials (EPSP) was  
217 numerically reduced after depleting Complex I, and quantal content (QC) was similarly reduced  
218 (Fig. 3A-U, Table S1). This numerical reduction in EPSP amplitude was statistically significant  
219 in 11/18 genetic lines we tested (Table S1). Of the 7 lines in which the EPSP reduction did not  
220 achieve statistical significance, 4 were mitochondrially-encoded (Table S1).

221 Because of the reduction of neurotransmission in many instances of MCI loss, we further  
222 checked if the NMJ could express PHP in the presence of *GluRIII* RNAi. As was the case with  
223 *ND-20L[RNAi]*, we found intact PHP signaling in most lines, as indicated by a significant  
224 increase in QC after *GluRIII* knockdown (Table S1). Together, our genetic data suggest that a  
225 majority of the core Complex I subunits in *Drosophila* regulate baseline synapse function. We  
226 decided to test this idea further by pharmacology.

227

## 228 **Pharmacology phenocopies Mitochondrial Complex I subunit gene knockdown**

229 Prior studies in *Drosophila* have targeted MCI via pharmacology. This has resulted in  
230 neurological and behavioral defects in adult flies reminiscent of human neurodegenerative  
231 conditions (Leite *et al.*, 2018). If it is the case that our genetic knockdown experiments are  
232 specific for MCI, then we should be able to phenocopy the NMJ electrophysiological defects  
233 with pharmacology. To target MCI, we used rotenone. Rotenone is an isoflavone derived from

234 plants, and it directly disrupts the electron transport chain of MCI and can result in an  
235 accumulation of reactive oxygen species (ROS) (Degli Esposti, 1998; Fato *et al.*, 2009).

236 We used several methods to deliver rotenone to the NMJ. We varied multiple parameters:  
237 drug concentration, exposure time, and delivery method. Larvae fed a low dose of rotenone (2  
238  $\mu\text{M}$ ) for 48 hours showed no defect in evoked EPSP amplitude compared to carrier alone (5%  
239 DMSO, 48 hours, Figs. 4A-B, N). Likewise, freshly dissected NMJ preps acutely soaked in a  
240 high dose of rotenone (500  $\mu\text{M}$ ) showed little EPSP defect compared to carrier alone (5%  
241 DMSO, Figs. 4C-D, N).

242 However, larvae fed a high dose of rotenone (500  $\mu\text{M}$ ) for longer periods (72 hours or 7  
243 hours) showed blunted EPSP amplitudes compared to carrier controls (Figs 4E-H, N).  
244 Additionally, larvae fed intermediate doses (25  $\mu\text{M}$  or 50  $\mu\text{M}$ ) throughout life (approximately  
245 120 hours from egg laying to third instar) also showed blunted EPSP amplitudes (Figs 4I-L, N).

246 Interestingly, not all of the delivery methods that caused a diminishment of EPSP  
247 amplitudes resulted in a decrease in quantal content (Figs 4M, O). This is because some delivery  
248 methods concurrently changed both quantal amplitude (Fig. 4M) and evoked amplitude (Fig.  
249 4N). This may be because global application of a drug that impairs MCI could also have  
250 postsynaptic effects that govern sensitivity to individual vesicles of neurotransmitter.

251

## 252 **Mitochondrial Complex I subunits regulate NMJ structural plasticity**

253 We conducted NMJ staining experiments to assess if cytological phenotypes might accompany  
254 MCI loss. While Complex I subunits are expressed ubiquitously throughout the development,  
255 their roles in synapse development are largely unknown. To test this parameter, we knocked  
256 down some of the Complex I core subunits that we had previously analyzed  
257 electrophysiologically (using pre+post synaptic Gal4 drivers), but this time we analyzed the  
258 larval neuromuscular junction (NMJ) morphology. To visualize NMJ bouton morphology, and  
259 we co-stained with anti-Synapsin (a pre-synaptic marker) and anti-Discs Large (Dlg, a post-  
260 synaptic marker) (Benson and Voigt, 1995; Budnik *et al.*, 1996).

261 Pre- + postsynaptic knockdown of Complex I subunits caused diminished NMJ structural  
262 development (Fig 5). For each subunit targeted, we observed diminished NMJ growth (Fig. 5A-  
263 F). This phenotype manifested in two different ways for different subunits: either as a decrease in  
264 total bouton number for animals reared at 25°C (*mt: ND6[RNAi]; ND-51L2[RNAi]*) (Fig. 5F) or  
265 as a diminishment in bouton area (*ND-20L[RNAi]*) (Fig. 5G-I).

266 For the case of *ND-20L[RNAi]* the decreased bouton size was coupled with a collapsing  
267 postsynaptic density, as indicated by decreased amounts of Dlg (Fig. 5G-J). Together, these data  
268 indicate that Complex I subunits regulate NMJ growth and morphology in *Drosophila*. In this  
269 case, diminished NMJ development as a result of MCI loss (Fig. 5) correlates with diminished  
270 NMJ function (Figs. 2-3).

271

## 272 **4. Discussion**

273 *Drosophila* Mitochondrial Complex I subunits are highly conserved with their mammalian  
274 counterparts, potentially making *Drosophila* an ideal system to understand cellular MCI roles in  
275 diseases (Fig. 1). In this study, we provide a snapshot of synaptic phenotypes that result from  
276 MCI impairment in *Drosophila*. These initial studies should help us to dissect the function of  
277 MCI in nervous system physiology. Our aggregate data are consistent with the idea that normal  
278 MCI enzyme function is required to support normal levels of synaptic transmission (Figs. 2-4).  
279 Diminished synaptic neurotransmission may be related to blunted synapse development (Fig. 5).

280 Notably, our current study does not define the cell-specific roles that MCI is playing in  
281 pre- and postsynaptic compartments. In the context of human disease, genetic MCI loss is global  
282 and not tissue-specific. For future our studies, the genetic toolkit available for *Drosophila* means  
283 that it should be possible to define tissue specific roles of MCI, in presynaptic neurons,  
284 postsynaptic muscle, or in nearby tissue like glia.

285

## 286 **Prior studies are consistent with synaptic functions of Complex I**

287 Genetic dysfunction of MCI subunits produces superoxide in the mitochondrial matrix  
288 (Antonucci et al., 2019). Superoxide radicals can be converted into hydroxyl radicals that are

289 highly reactive and cause cellular damage. Pharmacological perturbation of Complex I with  
290 rotenone or paraquat stimulates ROS production both *in vivo* and *in vitro* (Cocheme and Murphy,  
291 2008; Degli Esposti, 1998; Fato *et al.*, 2009). Relatedly, in adult *Drosophila*, Complex I  
292 inhibition by rotenone and paraquat triggers an acute response that is reminiscent of human  
293 mitochondrial disorder phenotypes (Hosamani and Muralidhara, 2013).

294 Although several genetic and biochemical studies have been performed to assess the  
295 efficacy of various compounds in suppressing rotenone and paraquat-induced toxicity in flies,  
296 little progress has been made to understand the precise consequences of Complex I dysfunction  
297 in nervous system physiology. Human mitochondrial disease-causing mutations have been  
298 identified in 33/44 MCI subunits (Mayr *et al.*, 2015). Mutation of *NDUFS4* causes Leigh  
299 syndrome and cardiomyopathy (Fassone and Rahman, 2012). In *Drosophila*, *dNDUFS4*  
300 depletion in neurons showed progressive neurodegeneration, shortened life span and locomotory  
301 defects, thus recapitulating patients with *NDUFS4* dysfunction (Foriel *et al.*, 2018). Additionally,  
302 ubiquitous knockdown of *Drosophila dNDUFS7 (ND-20)* and *dNDUFV1 (ND-51)* causes pupal  
303 eclosion defects and alternation in life span (Foriel *et al.*, 2019). Many of these phenotypes are  
304 consistent with possible synapse dysfunction.

305 Recently, a *Drosophila* model of Complex I deficiency was created for mitochondrially  
306 encoded subunit ND2 (Burman *et al.*, 2014). The *dND-2* mutants showed hallmarks of  
307 mitochondrial diseases, which include progressive neurodegeneration, muscle degeneration and  
308 reduced life span (Burman *et al.*, 2014). Other reports have highlighted the role of neuron and  
309 glial cells in the context of neurodegeneration triggered by Complex I inhibition (Hegde *et al.*,  
310 2014). For instance, simultaneous disruption of *NDUFS1* in neurons and glia showed progressive  
311 neurodegeneration in flies, suggesting that both cell populations are essential in *Drosophila*  
312 (Hegde *et al.*, 2014). By contrast, depletion of *dNDUFS8* in glial cells did not affect longevity  
313 and locomotor ability in animals, while exhibiting significant neurodegeneration in the brain  
314 (Cabirol-Pol *et al.*, 2018). A very similar phenotype was observed for *dNDUFS7B* where  
315 knockdown in neuron causes increased aggregation while exhibiting no effect when depleted in  
316 glia (Li-Byarlay *et al.*, 2014).

317

318 **Possible Models: presynaptic release or postsynaptic ROS**

319 Despite prior genetic and biochemical studies in the different model organisms, little  
320 information is known about the consequences of MCI dysfunction in nervous system at a single  
321 synapse level. At this point, we can propose a couple of different possibilities for impaired NMJ  
322 function and morphology. By one model, we can consider presynaptic compartment and synaptic  
323 vesicle fusion. Synaptic vesicle fusion is an energy-dependent process and depletion of Complex  
324 I subunits disrupts the transfer of electrons from NADH to ubiquinone. Hence, decreased proton  
325 motive force will reduce the amount of cellular ATP available for release.

326 By another model, disruption of Complex I in the muscle might produce elevated levels  
327 of reactive oxygen species intermediate (ROS), which are reactive and oxidizing. We speculate  
328 that ROS formation in the postsynaptic compartment might oxidize and disrupt postsynaptic  
329 structures such as Dlg (Fig. 5), Spectrin, and glutamate receptors that are crucial to maintaining a  
330 stable synaptic connection. The alteration of NMJ morphology could be a secondary  
331 consequence of the loss of postsynaptic structures, but it could also have a profound effect on  
332 synapse function. Our near-future studies on Complex I subunits will dissect distinct signaling  
333 mechanisms for *Drosophila* synapse regulation and function. In turn, studies downstream can test  
334 if these findings in our fruit fly model extend to vertebrate synaptic systems or mitochondrial  
335 disease models.

336

## 337 **5. References**

338

339 Antonucci, S., Mulvey, J.F., Burger, N., Di Sante, M., Hall, A.R., Hinchy, E.C., Caldwell, S.T.,  
340 Gruszczuk, A.V., Deshwal, S., Hartley, R.C., et al. (2019). Selective mitochondrial superoxide  
341 generation in vivo is cardioprotective through hormesis. *Free radical biology & medicine* *134*,  
342 678-687. 10.1016/j.freeradbiomed.2019.01.034.

343 Benson, T.E., and Voigt, H.F. (1995). Neuron labeling by extracellular delivery of horseradish  
344 peroxidase in vivo: a method for studying the local circuitry of projection and interneurons at  
345 physiologically characterized sites. *J Neurosci Methods* *57*, 81-91. 10.1016/0165-  
346 0270(94)00131-y.

347 Berger, I., Hershkovitz, E., Shaag, A., Edvardson, S., Saada, A., and Elpeleg, O. (2008).  
348 Mitochondrial complex I deficiency caused by a deleterious NDUFA11 mutation. *Ann Neurol*  
349 *63*, 405-408. 10.1002/ana.21332.

- 350 Breuer, M.E., Koopman, W.J., Koene, S., Nooteboom, M., Rodenburg, R.J., Willems, P.H., and  
351 Smeitink, J.A. (2013). The role of mitochondrial OXPHOS dysfunction in the development of  
352 neurologic diseases. *Neurobiology of disease* 51, 27-34. 10.1016/j.nbd.2012.03.007.
- 353 Bridges, H.R., Grgic, L., Harbour, M.E., and Hirst, J. (2009). The respiratory complexes I from  
354 the mitochondria of two *Pichia* species. *Biochem J* 422, 151-159. 10.1042/BJ20090492.
- 355 Brusich, D.J., Spring, A.M., and Frank, C.A. (2015). A single-cross, RNA interference-based  
356 genetic tool for examining the long-term maintenance of homeostatic plasticity. *Frontiers in*  
357 *cellular neuroscience* 9, 107. 10.3389/fncel.2015.00107.
- 358 Budnik, V., Koh, Y.H., Guan, B., Hartmann, B., Hough, C., Woods, D., and Gorczyca, M.  
359 (1996). Regulation of synapse structure and function by the *Drosophila* tumor suppressor gene  
360 *dlg*. *Neuron* 17, 627-640.
- 361 Burman, J.L., Itsara, L.S., Kayser, E.B., Suthammarak, W., Wang, A.M., Kaeberlein, M.,  
362 Sedensky, M.M., Morgan, P.G., and Pallanck, L.J. (2014). A *Drosophila* model of mitochondrial  
363 disease caused by a complex I mutation that uncouples proton pumping from electron transfer.  
364 *Dis Model Mech* 7, 1165-1174. 10.1242/dmm.015321.
- 365 Cabirol-Pol, M.J., Khalil, B., Rival, T., Faivre-Sarrailh, C., and Besson, M.T. (2018). Glial lipid  
366 droplets and neurodegeneration in a *Drosophila* model of complex I deficiency. *Glia* 66, 874-  
367 888. 10.1002/glia.23290.
- 368 Clason, T., Ruiz, T., Schagger, H., Peng, G., Zickermann, V., Brandt, U., Michel, H., and  
369 Radermacher, M. (2010). The structure of eukaryotic and prokaryotic complex I. *Journal of*  
370 *structural biology* 169, 81-88. 10.1016/j.jsb.2009.08.017.
- 371 Cocheme, H.M., and Murphy, M.P. (2008). Complex I is the major site of mitochondrial  
372 superoxide production by paraquat. *J Biol Chem* 283, 1786-1798. 10.1074/jbc.M708597200.
- 373 de Oliveira Souza, A., Couto-Lima, C.A., Catalao, C.H.R., Santos-Junior, N.N., Dos Santos, J.F.,  
374 da Rocha, M.J.A., and Alberici, L.C. (2019). Neuroprotective action of Eicosapentaenoic (EPA)  
375 and Docosahexaenoic (DHA) acids on Paraquat intoxication in *Drosophila melanogaster*.  
376 *Neurotoxicology* 70, 154-160. 10.1016/j.neuro.2018.11.013.
- 377 Degli Esposti, M. (1998). Inhibitors of NADH-ubiquinone reductase: an overview. *Biochimica et*  
378 *biophysica acta* 1364, 222-235. 10.1016/s0005-2728(98)00029-2.
- 379 Dietzl, G., Chen, D., Schnorrer, F., Su, K.C., Barinova, Y., Fellner, M., Gasser, B., Kinsey, K.,  
380 Oppel, S., Scheiblauer, S., et al. (2007). A genome-wide transgenic RNAi library for conditional  
381 gene inactivation in *Drosophila*. *Nature* 448, 151-156.
- 382 Fassone, E., and Rahman, S. (2012). Complex I deficiency: clinical features, biochemistry and  
383 molecular genetics. *Journal of medical genetics* 49, 578-590. 10.1136/jmedgenet-2012-101159.

- 384 Fato, R., Bergamini, C., Bortolus, M., Maniero, A.L., Leoni, S., Ohnishi, T., and Lenaz, G.  
385 (2009). Differential effects of mitochondrial Complex I inhibitors on production of reactive  
386 oxygen species. *Biochimica et biophysica acta* *1787*, 384-392. 10.1016/j.bbabi.2008.11.003.
- 387 Foriel, S., Beyrath, J., Eidhof, I., Rodenburg, R.J., Schenck, A., and Smeitink, J.A.M. (2018).  
388 Feeding difficulties, a key feature of the *Drosophila* NDUFS4 mitochondrial disease model. *Dis*  
389 *Model Mech* *11*. 10.1242/dmm.032482.
- 390 Foriel, S., Renkema, G.H., Lasarzewski, Y., Berkhout, J., Rodenburg, R.J., Smeitink, J.A.M.,  
391 Beyrath, J., and Schenck, A. (2019). A *Drosophila* Mitochondrial Complex I Deficiency  
392 Phenotype Array. *Front Genet* *10*, 245. 10.3389/fgene.2019.00245.
- 393 Formosa, L.E., Muellner-Wong, L., Reljic, B., Sharpe, A.J., Jackson, T.D., Beilharz, T.H.,  
394 Stojanovski, D., Lazarou, M., Stroud, D.A., and Ryan, M.T. (2020). Dissecting the Roles of  
395 Mitochondrial Complex I Intermediate Assembly Complex Factors in the Biogenesis of  
396 Complex I. *Cell reports* *31*, 107541. 10.1016/j.celrep.2020.107541.
- 397 Galkin, A., Drose, S., and Brandt, U. (2006). The proton pumping stoichiometry of purified  
398 mitochondrial complex I reconstituted into proteoliposomes. *Biochimica et biophysica acta* *1757*,  
399 1575-1581. 10.1016/j.bbabi.2006.10.001.
- 400 Galkin, A.S., Grivennikova, V.G., and Vinogradov, A.D. (1999).  $\text{-->H}^+/\text{2e}^-$  stoichiometry in  
401 NADH-quinone reductase reactions catalyzed by bovine heart submitochondrial particles. *FEBS*  
402 *letters* *451*, 157-161. 10.1016/s0014-5793(99)00575-x.
- 403 Garcia, C.J., Khajeh, J., Coulanges, E., Chen, E.I., and Owusu-Ansah, E. (2017). Regulation of  
404 Mitochondrial Complex I Biogenesis in *Drosophila* Flight Muscles. *Cell reports* *20*, 264-278.  
405 10.1016/j.celrep.2017.06.015.
- 406 Gonzalez-Rodriguez, P., Zampese, E., Stout, K.A., Guzman, J.N., Ilijic, E., Yang, B., Tkatch, T.,  
407 Stavarache, M.A., Wokosin, D.L., Gao, L., et al. (2021). Disruption of mitochondrial complex I  
408 induces progressive parkinsonism. *Nature* *599*, 650-656. 10.1038/s41586-021-04059-0.
- 409 Guarani, V., Paulo, J., Zhai, B., Huttlin, E.L., Gygi, S.P., and Harper, J.W. (2014).  
410 TIMMDC1/C3orf1 functions as a membrane-embedded mitochondrial complex I assembly  
411 factor through association with the MCIA complex. *Mol Cell Biol* *34*, 847-861.  
412 10.1128/MCB.01551-13.
- 413 Guenebaut, V., Schlitt, A., Weiss, H., Leonard, K., and Friedrich, T. (1998). Consistent structure  
414 between bacterial and mitochondrial NADH:ubiquinone oxidoreductase (complex I). *Journal of*  
415 *molecular biology* *276*, 105-112. 10.1006/jmbi.1997.1518.
- 416 Guenebaut, V., Vincentelli, R., Mills, D., Weiss, H., and Leonard, K.R. (1997). Three-  
417 dimensional structure of NADH-dehydrogenase from *Neurospora crassa* by electron microscopy  
418 and conical tilt reconstruction. *Journal of molecular biology* *265*, 409-418.  
419 10.1006/jmbi.1996.0753.

- 420 Guerrero-Castillo, S., Baertling, F., Kownatzki, D., Wessels, H.J., Arnold, S., Brandt, U., and  
421 Nijtmans, L. (2017). The Assembly Pathway of Mitochondrial Respiratory Chain Complex I.  
422 *Cell metabolism* 25, 128-139. 10.1016/j.cmet.2016.09.002.
- 423 Hazelrigg, T., Levis, R., and Rubin, G.M. (1984). Transformation of white locus DNA in  
424 *Drosophila*: dosage compensation, zeste interaction, and position effects. *Cell* 36, 469-481.
- 425 Hegde, V.R., Vogel, R., and Feany, M.B. (2014). Glia are critical for the neuropathology of  
426 complex I deficiency in *Drosophila*. *Human molecular genetics* 23, 4686-4692.  
427 10.1093/hmg/ddu188.
- 428 Hirst, J. (2013). Mitochondrial complex I. *Annu Rev Biochem* 82, 551-575. 10.1146/annurev-  
429 biochem-070511-103700.
- 430 Hirth, F. (2010). *Drosophila melanogaster* in the study of human neurodegeneration. *CNS Neurol*  
431 *Disord Drug Targets* 9, 504-523. 10.2174/187152710791556104.
- 432 Hosamani, R., and Muralidhara (2013). Acute exposure of *Drosophila melanogaster* to paraquat  
433 causes oxidative stress and mitochondrial dysfunction. *Arch Insect Biochem Physiol* 83, 25-40.  
434 10.1002/arch.21094.
- 435 Hunte, C., Zickermann, V., and Brandt, U. (2010). Functional modules and structural basis of  
436 conformational coupling in mitochondrial complex I. *Science* 329, 448-451.  
437 10.1126/science.1191046.
- 438 James, T.D., Zwiefelhofer, D.J., and Frank, C.A. (2019). Maintenance of homeostatic plasticity  
439 at the *Drosophila* neuromuscular synapse requires continuous IP3-directed signaling. *eLife* 8.  
440 10.7554/eLife.39643.
- 441 Kashani-Poor, N., Kerscher, S., Zickermann, V., and Brandt, U. (2001). Efficient large scale  
442 purification of his-tagged proton translocating NADH:ubiquinone oxidoreductase (complex I)  
443 from the strictly aerobic yeast *Yarrowia lipolytica*. *Biochimica et biophysica acta* 1504, 363-370.  
444 10.1016/s0005-2728(00)00266-8.
- 445 Koizumi, K., Higashida, H., Yoo, S., Islam, M.S., Ivanov, A.I., Guo, V., Pozzi, P., Yu, S.H.,  
446 Rovescalli, A.C., Tang, D., and Nirenberg, M. (2007). RNA interference screen to identify genes  
447 required for *Drosophila* embryonic nervous system development. *Proc Natl Acad Sci U S A* 104,  
448 5626-5631. 10.1073/pnas.0611687104.
- 449 Leite, G.O., Ecker, A., Seeger, R.L., Krum, B.N., Lugokenski, T.H., Fachinnetto, R., Sudati, J.H.,  
450 Barbosa, N.V., and Wagner, C. (2018). Protective effect of (-)-alpha-bisabolol on rotenone-  
451 induced toxicity in *Drosophila melanogaster*. *Can J Physiol Pharmacol* 96, 359-365.  
452 10.1139/cjpp-2017-0207.
- 453 Leonard, K., Haiker, H., and Weiss, H. (1987). Three-dimensional structure of NADH:  
454 ubiquinone reductase (complex I) from *Neurospora* mitochondria determined by electron  
455 microscopy of membrane crystals. *Journal of molecular biology* 194, 277-286. 10.1016/0022-  
456 2836(87)90375-5.



- 457 Lesch, C., Jo, J., Wu, Y., Fish, G.S., and Galko, M.J. (2010). A targeted UAS-RNAi screen in  
458 *Drosophila* larvae identifies wound closure genes regulating distinct cellular processes. *Genetics*  
459 *186*, 943-957. 10.1534/genetics.110.121822.
- 460 Li-Byarlay, H., Rittschof, C.C., Massey, J.H., Pittendrigh, B.R., and Robinson, G.E. (2014).  
461 Socially responsive effects of brain oxidative metabolism on aggression. *Proc Natl Acad Sci U S*  
462 *A 111*, 12533-12537. 10.1073/pnas.1412306111.
- 463 Mayr, J.A., Haack, T.B., Freisinger, P., Karall, D., Makowski, C., Koch, J., Feichtinger, R.G.,  
464 Zimmermann, F.A., Rolinski, B., Ahting, U., et al. (2015). Spectrum of combined respiratory  
465 chain defects. *J Inherit Metab Dis 38*, 629-640. 10.1007/s10545-015-9831-y.
- 466 Murray, J., Zhang, B., Taylor, S.W., Oglesbee, D., Fahy, E., Marusich, M.F., Ghosh, S.S., and  
467 Capaldi, R.A. (2003). The subunit composition of the human NADH dehydrogenase obtained by  
468 rapid one-step immunopurification. *J Biol Chem 278*, 13619-13622. 10.1074/jbc.C300064200.
- 469 Pignoni, F., Hu, B., and Zipursky, S.L. (1997). Identification of genes required for *Drosophila*  
470 eye development using a phenotypic enhancer-trap. *Proc Natl Acad Sci U S A 94*, 9220-9225.  
471 10.1073/pnas.94.17.9220.
- 472 Radermacher, M., Ruiz, T., Clason, T., Benjamin, S., Brandt, U., and Zickermann, V. (2006).  
473 The three-dimensional structure of complex I from *Yarrowia lipolytica*: a highly dynamic  
474 enzyme. *Journal of structural biology 154*, 269-279. 10.1016/j.jsb.2006.02.011.
- 475 Raut, S., Mallik, B., Parichha, A., Amrutha, V., Sahi, C., and Kumar, V. (2017). RNAi-Mediated  
476 Reverse Genetic Screen Identified *Drosophila* Chaperones Regulating Eye and Neuromuscular  
477 Junction Morphology. *G3 (Bethesda) 7*, 2023-2038. 10.1534/g3.117.041632.
- 478 Schilling, B., Bharath, M.M.S., Row, R.H., Murray, J., Cusack, M.P., Capaldi, R.A., Freed, C.R.,  
479 Prasad, K.N., Andersen, J.K., and Gibson, B.W. (2005). Rapid purification and mass  
480 spectrometric characterization of mitochondrial NADH dehydrogenase (Complex I) from rodent  
481 brain and a dopaminergic neuronal cell line. *Mol Cell Proteomics 4*, 84-96.  
482 10.1074/mcp.M400143-MCP200.
- 483 Stewart, B.A., Atwood, H.L., Renger, J.J., Wang, J., and Wu, C.F. (1994). Improved stability of  
484 *Drosophila* larval neuromuscular preparations in haemolymph-like physiological solutions. *J*  
485 *Comp Physiol A 175*, 179-191. 10.1007/BF00215114.
- 486 Stroud, D.A., Surgenor, E.E., Formosa, L.E., Reljic, B., Frazier, A.E., Dibley, M.G., Osellame,  
487 L.D., Stait, T., Beilharz, T.H., Thorburn, D.R., et al. (2016). Accessory subunits are integral for  
488 assembly and function of human mitochondrial complex I. *Nature 538*, 123-126.  
489 10.1038/nature19754.
- 490 Wikstrom, M. (1984). Two protons are pumped from the mitochondrial matrix per electron  
491 transferred between NADH and ubiquinone. *FEBS letters 169*, 300-304. 10.1016/0014-  
492 5793(84)80338-5.

## Synaptic Functions of Mitochondrial Complex-I

493 Yamamoto, S., Jaiswal, M., Charng, W.L., Gambin, T., Karaca, E., Mirzaa, G., Wiszniewski,  
494 W., Sandoval, H., Haelterman, N.A., Xiong, B., et al. (2014). A drosophila genetic resource of  
495 mutants to study mechanisms underlying human genetic diseases. *Cell* 159, 200-214.  
496 10.1016/j.cell.2014.09.002.

497

## 498 6. Figure Legends

499

### 500 **Figure 1: Organization and classification of *Drosophila* Mitochondrial Complex I (CI)** 501 **subunits**

502 (A) Schematic showing how Mitochondrial Complex I (MCI) is organized into three distinct  
503 classes of subunits (Nuclear-encoded core: 7 subunits, mitochondrial-encoded: 7 subunits and  
504 nuclear-encoded accessory: 28 subunits). (B) Schematic representation of how the 42 different  
505 subunits of *Drosophila* MCI are arranged to produce the L-shaped topology; adapted from  
506 (Guarani et al., 2014). NDUFS7/S7 (*ND-20L*) is labeled in red.

507

508

### 509 **Figure 2. An RNAi screen to identify genes involved in homeostatic synaptic plasticity for** 510 **human neurological and muscle-related disorders in *Drosophila*.**

511

512 (A) Crossing scheme for screen. Pre+Post-Gal4; *GluRIII*[RNAi] × *UAS-yfg*[RNAi] (*yfg*, “your  
513 favorite gene”). For UAS-RNAi lines on chromosomes II or III, male progeny were examined by  
514 electrophysiology because dosage compensated *elaV(C155)-Gal4/Y* male progeny should have a  
515 higher dose of pre-synaptic Gal4 than *elaV(C155)-Gal4/+* female siblings. (B) Screen results are  
516 highlighted with red and blue bars in the histogram. EPSP ≤ 24 mV and ≥ 28 mV were  
517 considered as hits and normal phenotypes, respectively. (C) Representative electrophysiological  
518 traces for indicated genotypes in the presence and absence of *GluRIII* RNAi. Scale bars for  
519 EPSPs (mEPSPs) are x = 50 ms (1000 ms) and y = 10 mV (1 mV). (D) Quantification showing  
520 mEPSP, EPSPs amplitude and quantal content in pre+post-Gal4(mEPSP: 0.93 ± 0.05, EPSP:  
521 38.99 ± 2.02, QC: 42.20 ± 2.65), pre+post-*GluRIII* RNAi (mEPSP: 0.49 ± 0.03, EPSP: 35.08 ±  
522 0.82, QC: 73.82 ± 6.52), pre+post *ND-20L* RNAi (mEPSP: 0.80 ± 0.03, EPSP: 27.44 ± 0.70, QC:  
523 34.44 ± 1.34) and pre+post *ND-20L+GluRIII* RNAi (mEPSP: 0.44 ± 0.05, EPSP: 19.55 ± 0.68,  
524 QC: 48.18 ± 6.95). The data for pre+post *ND-20L* RNAi and pre+post *ND-20L+GluRIII* RNAi  
525 are also represented in the supplemental Table S1. Statistical analysis based on one-way

526 ANOVA with Tukey's post-hoc test. Error bars represent mean±s.e.m. \*  $p < 0.05$ , \*\*  $p < 0.01$ ,  
527 \*\*\*  $p < 0.001$ .

528

529 **Figure 3: Core complex I subunits regulate neurotransmission** (A-R) Representative traces  
530 for pre+post-Gal4 driven Mitochondrial Complex I subunits in the presence and absence of  
531 *GluRIII* RNAi. Scale bars for EPSPs (mEPSPs) are  $x = 50$  ms (1000 ms) and  $y = 10$  mV (1 mV).  
532 (S-U) Histogram showing average mEPSP, EPSPs amplitude and quantal content in Pre+post-  
533 Gal4 control, Pre+post-Gal4 driven *GluRIII* RNAi, Pre+post-Gal4 driven MCI subunits and  
534 Pre+post-Gal4 driven *GluRIII* RNAi and MCI RNAi core subunits in the indicated genotypes. At  
535 least 8 NMJ recordings of each genotype were used for quantification. Pre- and postsynaptic  
536 RNAi corresponding to nuclear and mitochondrial encoded MCI subunits were analyzed for  
537 EPSPs through electrophysiological recordings.  $p$ -values for EPSPs are indicated in Table S1.  
538 Statistical analysis based on Student's t-test for pairwise comparisons (in determining PHP for a  
539 specific genotype), or one-way ANOVA followed by post-hoc Tukey's multiple comparisons.  
540 Error bars represent mean±s.e.m. \*  $p < 0.05$ , \*\*  $p < 0.01$ , \*\*\*  $p < 0.001$ .

541

542 **Figure 4: Rotenone diminishes neurotransmission at the NMJ** (A-L) Representative traces  
543 for third instar wild-type larvae treated or fed with DMSO and rotenone at various concentrations  
544 as indicated above. Scale bars for EPSPs (mEPSPs) are  $x = 50$  ms (1000 ms) and  $y = 10$  mV (1  
545 mV). (M-O) Histogram showing average mEPSP, EPSPs amplitude and quantal content of larvae  
546 treated with DMSO and rotenone in the indicated conditions. Note that larvae treated or fed a  
547 high dose of rotenone showed decreased EPSP amplitudes compared to carrier controls. At least  
548 8 NMJs recordings of each genotype were used for quantification.  $p$ -values for EPSPs are  
549 indicated in Table S2. Statistical analysis based on Student's t-test for pairwise comparison.  
550 Error bars represent mean±s.e.m.

551

552 **Figure 5: *Drosophila* Mitochondrial Complex I subunits are required for normal**  
553 **neuromuscular junction (NMJ) morphology.**

554 (A-E) Representative confocal images of NMJ synapses at muscle 6/7 of (A) Pre+post-Gal4  
555 control ( $105.0 \pm 6.38$ ), Pre+post-Gal4 driven (B) *ND-20L* RNAi ( $108.9 \pm 8.01$ ), (C) *mt: ND6*  
556 RNAi ( $72.75 \pm 4.77$ ), (D) *ND-51L2* RNAi ( $73.88 \pm 4.50$ ) and (E) *ND-51* RNAi ( $64.63 \pm 7.46$ )  
557 flies double immunolabeled with Dlg (magenta) and synapsin (green) antibodies. The NMJ  
558 morphological defects were observed in the indicated genotypes. Scale bar: 10  $\mu\text{m}$ . (F)  
559 Histograms showing the average total number of boutons at muscle 6/7 of A2 hemisegment in  
560 Pre+post-Gal4 control ( $105.0 \pm 6.38$ ), Pre+post-Gal4 driven *ND-20L* RNAi ( $108.9 \pm 8.01$ ), *mt:*  
561 *ND6* RNAi ( $72.75 \pm 4.77$ ), *ND-51L2* RNAi ( $73.88 \pm 4.50$ ), control ( $75.86 \pm 8.57$ ) and *ND-51*  
562 RNAi ( $64.63 \pm 7.46$ ) larvae. (G-H) Confocal images of boutons at third instar larval NMJ  
563 synapse in (G) Pre+post-Gal4 control and (H) Pre+post-Gal4 driven *ND-20L* RNAi double  
564 immunolabeled with Dlg (magenta) and HRP (green) antibodies. Note that the gross morphology  
565 of SSR and the immunoreactivity of Dlg were reduced in *ND-20L* RNAi compared to control. (I-  
566 J) Histograms showing average bouton area (I) relative Dlg area (J) in  $\mu\text{m}^2$  of Pre+post-Gal4  
567 control (bouton area:  $11.49 \pm 0.88$ , relative Dlg area:  $8.93 \pm 0.65$ ), Pre+post-Gal4 driven *ND-20L*  
568 RNAi bouton area: ( $6.12 \pm 0.34$ , relative Dlg area:  $4.74 \pm 0.29$ ) larvae. Scale bar represents 10  
569  $\mu\text{m}$ . Statistical analysis based on Student's t-test for pairwise comparison and one-way ANOVA  
570 with Tukey's post-hoc test for multiple comparisons. Error bars represent mean $\pm$ s.e.m. \*  $p <$   
571 0.05, \*\*  $p < 0.01$ , \*\*\*  $p < 0.001$ .

572

## 573 **7. Conflicts of interest**

574 The authors declare that the research was conducted in the absence of any commercial or  
575 financial relationships that could be construed as a potential conflict of interest.

## 576 **8. Author contributions**

577 B.M. and C.A.F. designed the research; B.M. performed the research; B.M. and C.A.F. analyzed  
578 the data; B.M. and C.A.F. wrote the paper.

579

## 580 **9. Funding**

581 This work was supported by a grant from the National Institutes of Health/NINDS  
582 (R01NS085164) to C.A.F. B.M. was supported in part by this grant.

583

## 584 **10. Acknowledgments**

585 We acknowledge the Developmental Studies Hybridoma Bank (Iowa, USA) for antibodies used  
586 in this study and the Bloomington Drosophila Stock Center for fly stocks. We thank Frank lab  
587 members for their helpful comments and discussions in this study. For research in progress  
588 discussions, we thank members of the laboratories of Drs. Tina Tootle, Toshihiro Kitamoto,  
589 Pamela Geyer, and Lori Wallrath; we also thank faculty from the Department of Anatomy and  
590 Cell Biology at the University of Iowa for weekly workshop discussions.

591

## 592 **11. Supplementary Material**

593 Please see Supplementary Tables S1-S3. Table S1 shows raw electrophysiology data for  
594 Mitochondrial Complex I loss-of-function conditions. Table S2 shows raw electrophysiology  
595 data for rotenone application. Table S3 details *Drosophila* stocks and antibodies used.

596

## 597 **12. Data Availability Statement**

598 The raw data supporting the conclusions in this article will be made available by the authors,  
599 without undue reservation.

600

**A**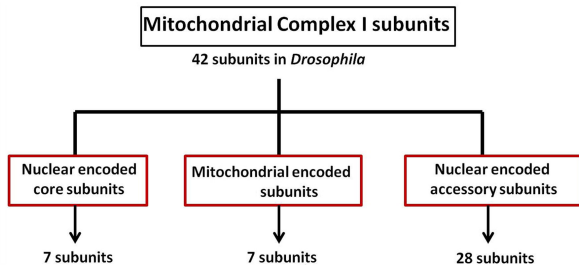**B**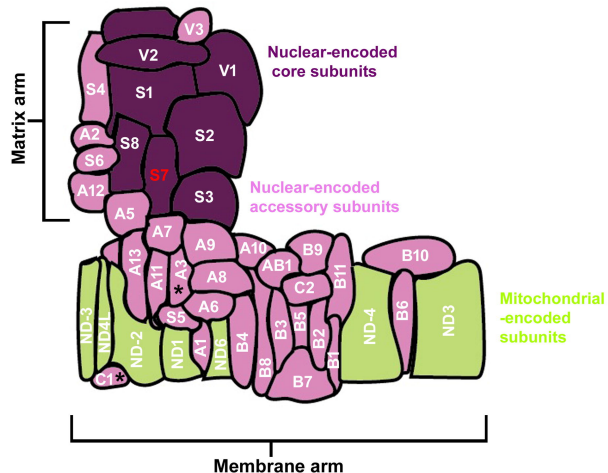\* No *Drosophila* ortholog identifiedAdapted from Guarani *et.al.*, 2014

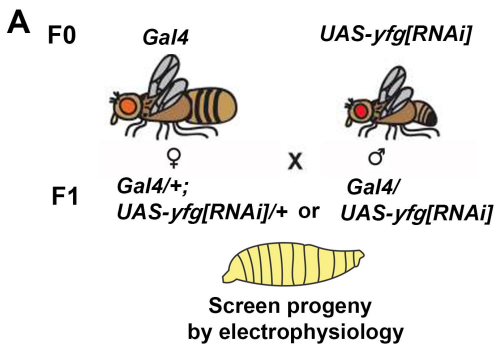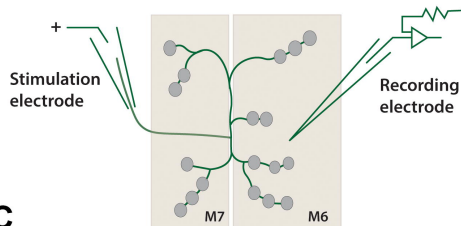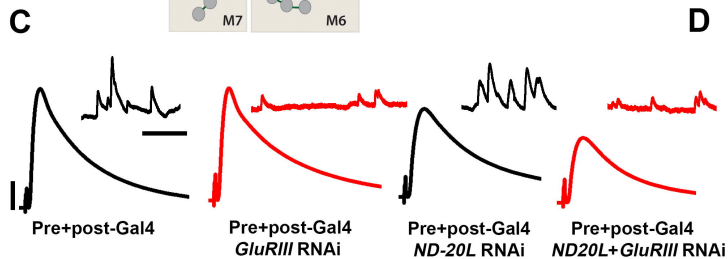

**B**

Screen of *Drosophila* homologs with human neurological of muscle-related disorder links

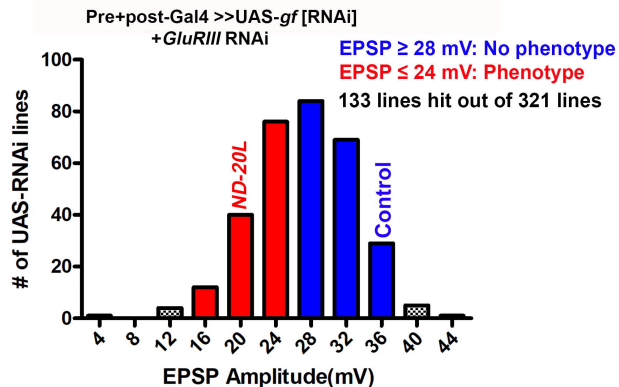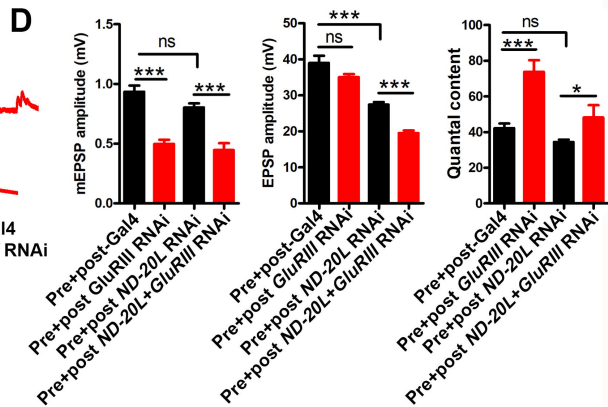



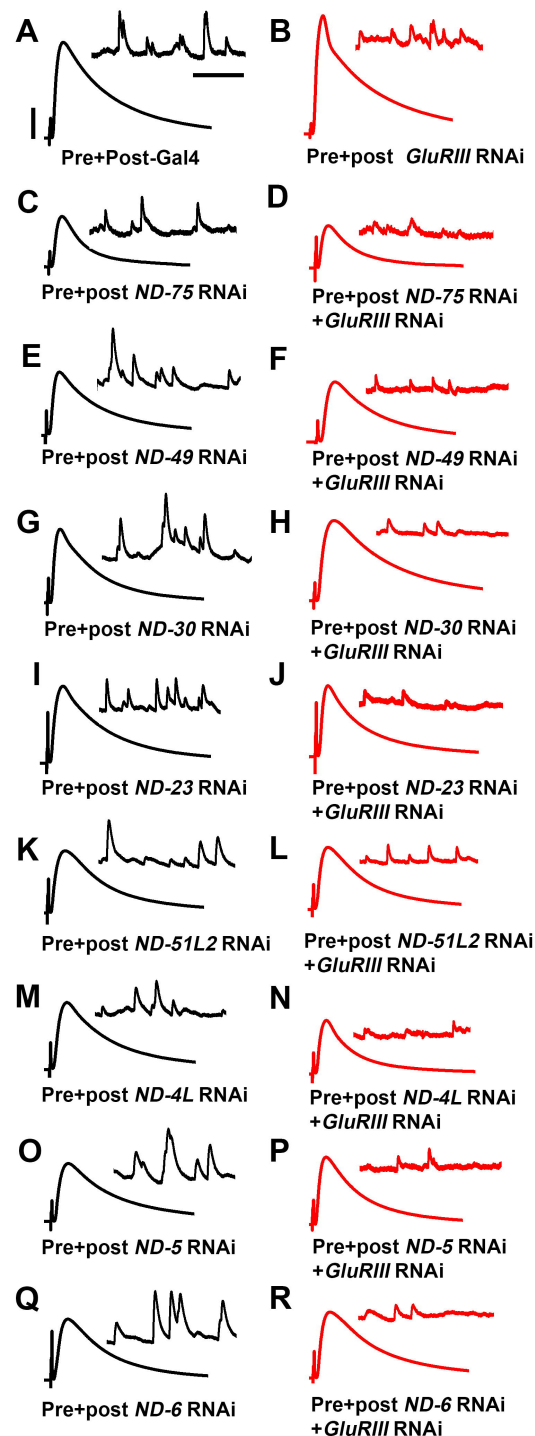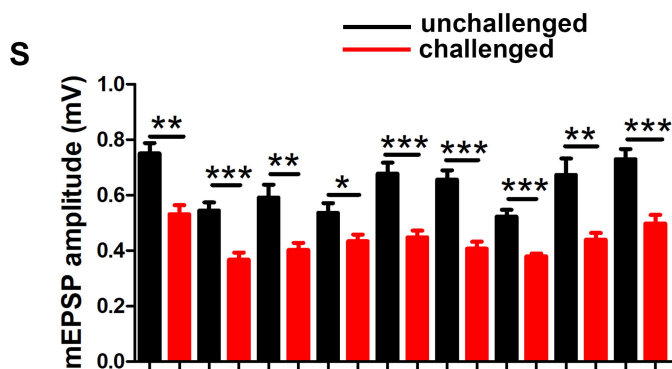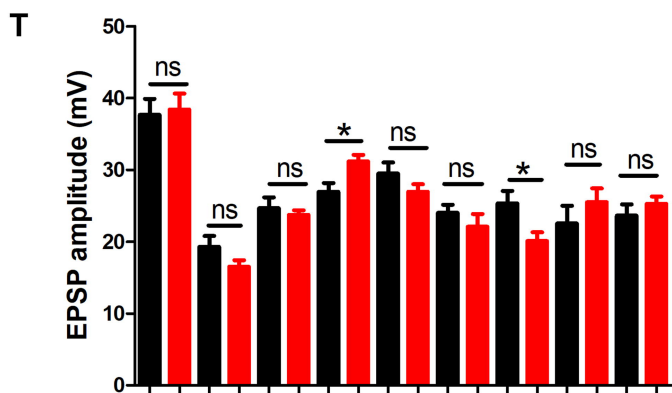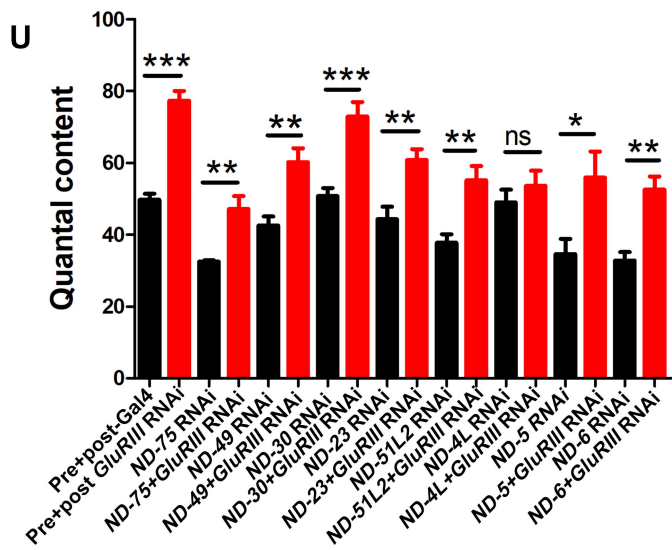

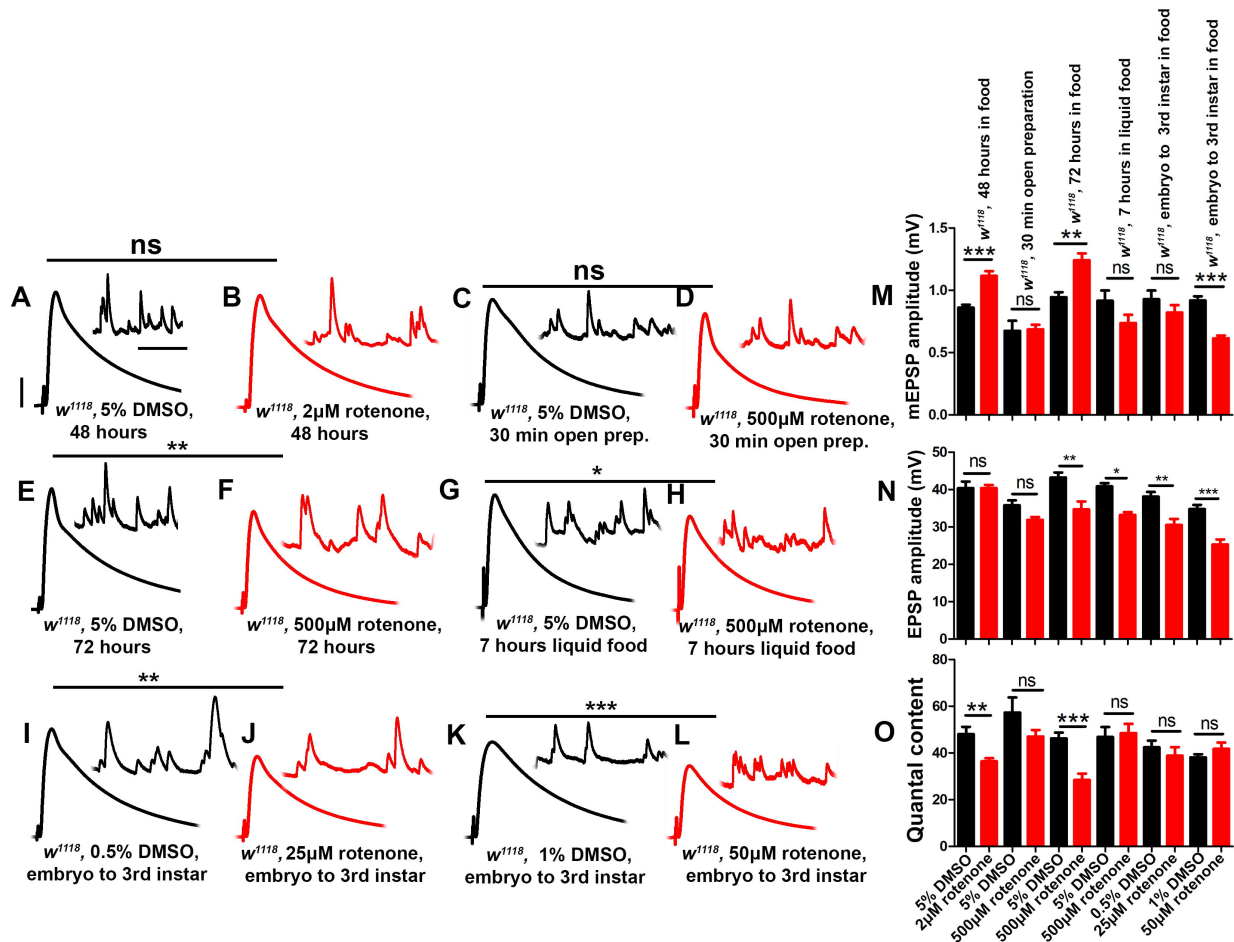

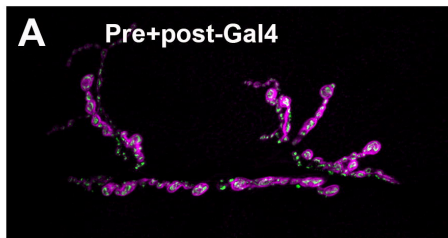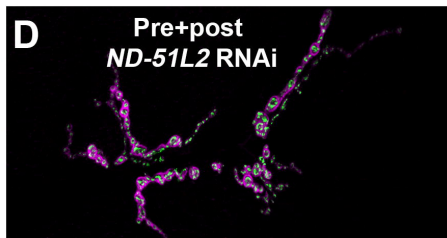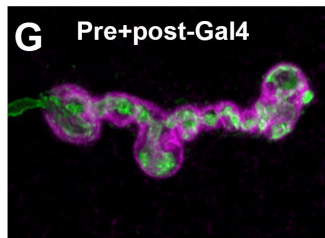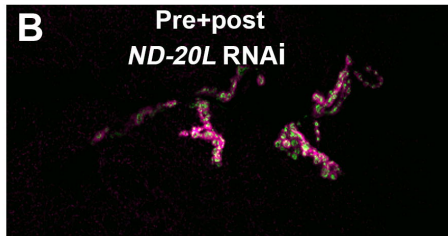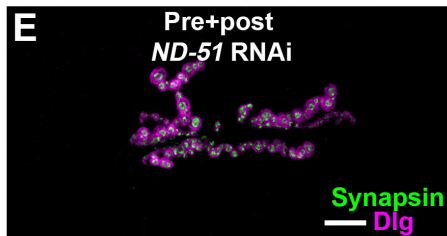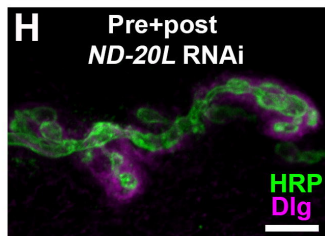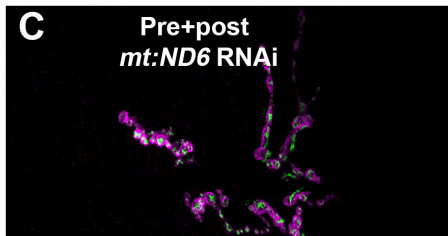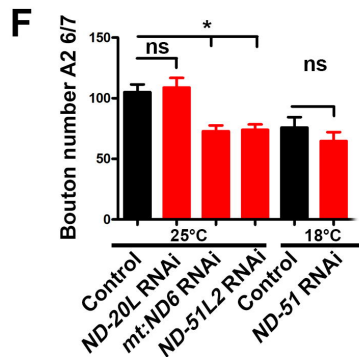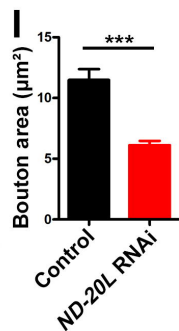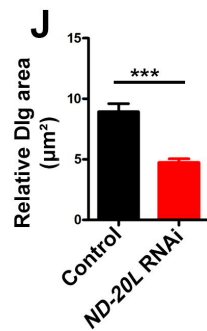

Source: http://biorxiv.org/content/10.1101/2021.12.30.474605v1.full.pdf
